# Supplementary material
Source: Research Square preprint supplement (doi:10.21203/rs.3.rs-9907658/v1)
Supplement: Supplementary file 1 [file e28270589826c5450cfcb00b.xlsx]

## Sheet: Sheet1
medication	ATC1	ATC2	DDD1	DDD2	Adm.R 1	Adm.R 2	condition	Note1	Note2
acebutolol	C07AB04	C07AB04	0.4	0.4	O	P	2
acepromazine	N05AA04	N05AA04	0.1	50	O	P	4
acetazolamide	S01EC01	S01EC01	0.75	0.75	O	P	2
acetylcysteine	R05CB01	R05CB01	1.6	0.5	Inhal.solution	O	4
acetylsalicylic acid	B01AC06	N02BA01	1	3	O	O	7	Independent of strength
acetylsalicylic acid	B01AC06	N02BA01	1	1	O	P	6	Independent of strength	Expressed as lysine acetylsalisylate
acetylsalicylic acid	B01AC06	N02BA01	1	3	O	R	8	Independent of strength
acetylsalicylic acid	N02BA01	N02BA01	3	1	O	P	4		Expressed as lysine acetylsalisylate
acetylsalicylic acid	N02BA01	N02BA01	3	3	O	R	2
acetylsalicylic acid	N02BA01	N02BA01	1	3	P	R	4	Expressed as lysine acetylsalisylate
aciclovir	J05AB01	J05AB01	4	4	O	P	2
alclofenac	M01AB06	M01AB06	1.25	1.25	O	R	2
alfacalcidol	A11CC03	A11CC03	1	1	O	P	2
alimemazine	R06AD01	R06AD01	30	30	O	P	2
alizapride	A03FA05	A03FA05	0.15	0.15	O	P	2
allopurinol	M04AA01	M04AA01	0.4	0.4	O	P	2
alprenolol	C07AA01	C07AA01	0.4	0.4	O	P	2
alprostadil	C01EA01	G04BE01	0.5	20	P	P	7
alprostadil	C01EA01	G04BE01	0.5	0.25	P	urethral	8
alprostadil	G04BE01	G04BE01	20	0.25	P	urethral	4
amfetamine	N06BA01	N06BA01	15	15	O	P	2
amikacin	J01GB06	J01GB06	0.59	1	Inhal.solution	P	4
aminobutyric acid	N03AG03	N03AG03	1	1	O	P	2
aminocaproic acid	B02AA01	B02AA01	16	16	O	P	2
aminophylline	R03DA05	R03DA05	0.6	0.6	O	P	2
aminophylline	R03DA05	R03DA05	0.6	0.6	O	R	2
aminophylline	R03DA05	R03DA05	0.6	0.6	P	R	2
amiodarone	C01BD01	C01BD01	0.2	0.2	O	P	2
amisulpride	N05AL05	N05AL05	0.4	7.5	O	P	4
amitriptyline	N06AA09	N06AA09	75	75	O	P	2
amobarbital	N05CA02	N05CA02	0.1	0.1	O	P	2
amoxicillin	J01CA04	J01CA04	1.5	3	O	P	4
amoxicillin and beta-lactamase inhibitor	J01CR02	J01CR02	1.5	3	O	P	4	Refers to amoxicillin	Refers to amoxicillin
amphotericin B	A01AB04	A07AA07	40	0.4	O	O	7
amphotericin B	A01AB04	G01AA03	40	0.2	O	V	8
amphotericin B	A01AB04	J02AA01	40	35	O	P	8
amphotericin B	A07AA07	G01AA03	0.4	0.2	O	V	8
amphotericin B	A07AA07	J02AA01	0.4	35	O	P	8
amphotericin B	G01AA03	J02AA01	0.2	35	V	P	8
ampicillin	J01CA01	J01CA01	2	6	O	P	4
ampicillin	J01CA01	J01CA01	2	2	O	R	2
ampicillin	J01CA01	J01CA01	6	2	P	R	4
antazoline	R06AX05	R06AX05	0.3	0.3	O	P	2
apomorphine	G04BE07	N04BC07	2	20	SL	P	8
aprepitant	A04AD12	A04AD12	165	150	O	P	4		Refers to fosaprepitant
aprindine	C01BB04	C01BB04	0.1	0.1	O	P	2
aprobarbital	N05CA05	N05CA05	0.1	0.1	O	P	2
aripiprazole	N05AX12	N05AX12	15	13.3	O	P	4		depot
aripiprazole	N05AX12	N05AX12	15	15	O	P	2
aripiprazole	N05AX12	N05AX12	13.3	15	P	P	3	depot
artemether	P01BE02	P01BE02	0.28	0.12	O	P	4
artemether	P01BE02	P01BE02	0.28	0.28	O	R	2
artemether	P01BE02	P01BE02	0.12	0.28	P	R	4
artesunate	P01BE03	P01BE03	0.28	0.28	O	P	2
artesunate	P01BE03	P01BE03	0.28	0.28	O	R	2
artesunate	P01BE03	P01BE03	0.28	0.28	P	R	2
ascorbic acid (vit C)	A11GA01	A11GA01	0.2	0.2	O	P	2
atenolol	C07AB03	C07AB03	75	75	O	P	2
atropine	A03BA01	A03BA01	1.5	1.5	O	P	2
azathioprine	L04AX01	L04AX01	0.15	0.15	O	P	2
azelastine	R01AC03	R06AX19	0.56	4	N	O	8
azithromycin	J01FA10	J01FA10	0.3	0.5	O	P	4
aztreonam	J01DF01	J01DF01	0.225	4	Inhal.solution	P	4
baclofen	M03BX01	M03BX01	50	0.55	O	P	4
beclometasone	R01AD01	R03BA01	0.4	0.8	N	Inhal.aerosol	8
beclometasone	R01AD01	R03BA01	0.4	0.8	N	Inhal.powder	8
beclometasone	R01AD01	R03BA01	0.4	1.5	N	Inhal.solution	8
beclometasone	R03BA01	R03BA01	0.8	0.8	Inhal.aerosol	Inhal.powder	2
beclometasone	R03BA01	R03BA01	0.8	1.5	Inhal.aerosol	Inhal.solution	4
beclometasone	R03BA01	R03BA01	0.8	1.5	Inhal.powder	Inhal.solution	4
benzatropine	N04AC01	N04AC01	2	2	O	P	2
benzoctamine	N05BD01	N05BD01	30	30	O	P	2
benzydamine	M01AX07	M01AX07	0.15	0.15	O	R	2
benzydamine	M01AX07	R02AX03	0.15	9	O	O	7
benzydamine	M01AX07	R02AX03	0.15	9	R	O	8
betamethasone	H02AB01	H02AB01	1.5	1.5	O	P	2
betamethasone	H02AB01	H02AB01	1.5	0.4	O	P	4		depot
betamethasone	H02AB01	R01AD06	1.5	0.4	O	N	8
betamethasone	H02AB01	H02AB01	1.5	0.4	P	P	3		depot
betamethasone	H02AB01	R01AD06	1.5	0.4	P	N	8
betamethasone	H02AB01	R01AD06	0.4	0.4	P	N	6	depot
biperiden	N04AA02	N04AA02	10	10	O	P	2
bisacodyl	A06AB02	A06AB02	10	10	O	R	2
brivaracetam	N03AX23	N03AX23	0.1	0.1	O	P	2
bromhexine	R05CB02	R05CB02	24	24	O	P	2
bromocriptine	G02CB01	G02CB01	5	5	O	P	2
bromocriptine	G02CB01	N04BC01	5	40	O	O	7
bromocriptine	G02CB01	N04BC01	5	40	P	O	8
bromopride	A03FA04	A03FA04	20	20	O	P	2
bromperidol	N05AD06	N05AD06	10	10	O	P	2
bromperidol	N05AD06	N05AD06	10	3.3	O	P	4		depot
bromperidol	N05AD06	N05AD06	10	3.3	P	P	3		depot
budesonide	A07EA06	A07EA06	9	1.5	O	SL	4
budesonide	A07EA06	R01AD05	9	0.2	O	N	8
budesonide	A07EA06	R03BA02	9	0.8	O	Inhal.aerosol	8
budesonide	A07EA06	R03BA02	9	0.8	O	Inhal.powder	8
budesonide	A07EA06	R03BA02	9	1.5	O	Inhal.solution	8
budesonide	A07EA06	R01AD05	1.5	0.2	SL	N	8
budesonide	A07EA06	R03BA02	1.5	0.8	SL	Inhal.aerosol	8
budesonide	A07EA06	R03BA02	1.5	0.8	SL	Inhal.powder	8
budesonide	A07EA06	R03BA02	1.5	1.5	SL	Inhal.solution	6
budesonide	R01AD05	R03BA02	0.2	0.8	N	Inhal.aerosol	8
budesonide	R01AD05	R03BA02	0.2	0.8	N	Inhal.powder	8
budesonide	R01AD05	R03BA02	0.2	1.5	N	Inhal.solution	8
budesonide	R03BA02	R03BA02	0.8	0.8	Inhal.aerosol	Inhal.powder	2
budesonide	R03BA02	R03BA02	0.8	1.5	Inhal.aerosol	Inhal.solution	4
budesonide	R03BA02	R03BA02	0.8	1.5	Inhal.powder	Inhal.solution	4
bumetanide	C03CA02	C03CA02	1	1	O	P	2
buphenine	C04AA02	G02CA02	30	30	O	P	6
buprenorphine	N02AE01	N02AE01	1.2	1.2	P	SL	2
buprenorphine	N02AE01	N02AE01	1.2	1.2	P	TD	2
buprenorphine	N02AE01	N07BC01	1.2	1.6	P	implant	8
buprenorphine	N02AE01	N07BC01	1.2	2.1	P	P	7
buprenorphine	N02AE01	N07BC01	1.2	8	P	SL	8
buprenorphine	N02AE01	N02AE01	1.2	1.2	SL	TD	2
buprenorphine	N02AE01	N07BC01	1.2	1.6	SL	implant	8
buprenorphine	N02AE01	N07BC01	1.2	2.1	SL	P	8
buprenorphine	N02AE01	N07BC01	1.2	8	SL	SL	7
buprenorphine	N02AE01	N07BC01	1.2	1.6	TD	implant	8
buprenorphine	N02AE01	N07BC01	1.2	2.1	TD	P	8
buprenorphine	N02AE01	N07BC01	1.2	8	TD	SL	8
buprenorphine	N07BC01	N07BC01	1.6	2.1	implant	P	4
buprenorphine	N07BC01	N07BC01	1.6	8	implant	SL	4
buprenorphine	N07BC01	N07BC01	2.1	8	P	SL	4
buserelin	L02AE01	L02AE01	0.11	1.2	implant	N	4
buserelin	L02AE01	L02AE01	0.11	1.5	implant	P	4
buserelin	L02AE01	L02AE01	1.2	1.5	N	P	4
butylscopolamine	A03BB01	A03BB01	60	60	O	P	2
butylscopolamine	A03BB01	A03BB01	60	60	O	R	2
butylscopolamine	A03BB01	A03BB01	60	60	P	R	2
cabergoline	G02CB03	N04BC06	0.5	3	O	O	7
cabotegravir	J05AJ04	J05AJ04	30	10	O	P	4
caffeine	N06BC01	N06BC01	0.4	0.4	O	P	2
calcitonin (salmon synthetic)	H05BA01	H05BA01	200	100	N	P	4
calcitriol	A11CC04	A11CC04	1	1	O	P	2
calcium folinate	V03AF03	V03AF03	60	60	O	P	2	Expressed as folinic acid	Expressed as folinic acid
calcium levofolinate	V03AF04	V03AF04	30	30	O	P	2	Expressed as levofolinic acid
camylofin	A03AA03	A03AA03	0.2	0.2	O	R	2
carbachol	N07AB01	N07AB01	6	0.5	O	P	4
carbachol	N07AB01	S01EB02	6	0.4	O	Ophthalmic	8
carbachol	N07AB01	S01EB02	0.5	0.4	P	Ophthalmic	8
carbamazepine	N03AF01	N03AF01	1	1	O	R	2
carbasalate calcium	B01AC08	N02BA15	1	3.6	O	O	7
cefotiam	J01DC07	J01DC07	1.2	4	O	P	4
cefradine	J01DB09	J01DB09	2	2	O	P	2
cefuroxime	J01DC02	J01DC02	0.5	3	O	P	4
chloral hydrate	N05CC01	N05CC01	1	1	O	R	2
chloramphenicol	J01BA01	J01BA01	3	3	O	P	2
chlordiazepoxide	N05BA02	N05BA02	30	50	O	P	4
chlorhexidine	A01AB03	R02AA05	30	30	O	O	5
chloropyramine	R06AC03	R06AC03	0.15	20	O	P	4
chloroquine	P01BA01	P01BA01	0.5	0.5	O	P	2	base	base
chlorphenamine	R06AB04	R06AB04	12	12	O	P	2
chlorphenoxamine	R06AA06	R06AA06	80	80	O	P	2
chlorpromazine	N05AA01	N05AA01	0.3	0.1	O	P	4
chlorpromazine	N05AA01	N05AA01	0.3	0.3	O	R	2
chlorpromazine	N05AA01	N05AA01	0.1	0.3	P	R	4
chlorprothixene	N05AF03	N05AF03	0.3	50	O	P	4
choline theophyllinate	R03DA02	R03DA02	0.6	0.6	O	R	2
ciclesonide	R01AD13	R03BA08	0.2	0.16	N	Inhal.aerosol	8
ciclosporin	L04AD01	L04AD01	0.25	0.25	O	P	2
cimetidine	A02BA01	A02BA01	0.8	0.8	O	P	2
ciprofloxacin	J01MA02	J01MA02	1	0.8	O	P	4
cisapride	A03FA02	A03FA02	30	30	O	R	2
citalopram	N06AB04	N06AB04	20	20	O	P	2
cladribine	L04AA40	L01BB04	0.34	6.3	O	P	8
clarithromycin	J01FA09	J01FA09	0.5	1	O	P	4
clemastine	R06AA04	R06AA04	2	2	O	P	2
clindamycin	G01AA10	J01FF01	0.1	1.2	V	O	8
clindamycin	G01AA10	J01FF01	0.1	1.8	V	P	8
clindamycin	J01FF01	J01FF01	1.2	1.8	O	P	4
clobutinol	R05DB03	R05DB03	0.12	0.12	O	P	2
clodronic acid	M05BA02	M05BA02	1.6	1.5	O	P	4		course dose
clofezone	M01AA05	M01AA05	0.6	0.6	O	R	2
clomethiazole	N05CM02	N05CM02	1.5	1.5	O	P	2
clomipramine	N06AA04	N06AA04	0.1	0.1	O	P	2
clonazepam	N03AE01	N03AE01	8	8	O	P	2
clonidine	C02AC01	C02AC01	0.45	0.45	O	P	2
clonidine	C02AC01	N02CX02	0.45	0.1	O	O	7
clonidine	C02AC01	N02CX02	0.45	0.1	P	O	8
clopenthixol	N05AF02	N05AF02	0.1	0.1	O	P	2
clotiapine	N05AH06	N05AH06	80	80	O	P	2
cloxacillin	J01CF02	J01CF02	2	2	O	P	2
clozapine	N05AH02	N05AH02	0.3	0.3	O	P	2
colchicine	M04AC01	M04AC01	1	1	O	P	2
colistin	A07AA10	J01XB01	9	3	O	Inhal.powder	8
colistin	A07AA10	J01XB01	9	3	O	Inhal.solution	8
colistin	A07AA10	J01XB01	9	9	O	P	6
colistin	J01XB01	J01XB01	3	3	Inhal.powder	Inhal.solution	2
colistin	J01XB01	J01XB01	3	9	Inhal.powder	P	4
colistin	J01XB01	J01XB01	3	9	Inhal.solution	P	4
combinations	A10AB30	A10AC30	40	40	P	P	5
combinations	A10AB30	A10AD30	40	40	P	P	5
combinations	A10AB30	A10AE30	40	40	P	P	5
combinations	A10AC30	A10AD30	40	40	P	P	5
combinations	A10AC30	A10AE30	40	40	P	P	5
combinations	A10AD30	A10AE30	40	40	P	P	5
conjugated estrogens	G03CA57	G03CA57	0.625	0.625	O	V	2
cortisone	H02AB10	H02AB10	37.5	37.5	O	P	2
cromoglicic acid	A07EB01	R01AC01	0.8	40	O	N	8
cromoglicic acid	A07EB01	R03BC01	0.8	40	O	Inhal.aerosol	8
cromoglicic acid	A07EB01	R03BC01	0.8	80	O	Inhal.powder	8
cromoglicic acid	A07EB01	R03BC01	0.8	80	O	Inhal.solution	8
cromoglicic acid	R01AC01	R03BC01	40	40	N	Inhal.aerosol	6
cromoglicic acid	R01AC01	R03BC01	40	80	N	Inhal.powder	8
cromoglicic acid	R01AC01	R03BC01	40	80	N	Inhal.solution	8
cromoglicic acid	R03BC01	R03BC01	40	80	Inhal.aerosol	Inhal.powder	4
cromoglicic acid	R03BC01	R03BC01	40	80	Inhal.aerosol	Inhal.solution	4
cromoglicic acid	R03BC01	R03BC01	80	80	Inhal.powder	Inhal.solution	2
cyanocobalamin	B03BA01	B03BA01	70	1	N	O	4	Fe3+	Fe3+
cyanocobalamin	B03BA01	B03BA01	70	20	N	P	4	Fe3+	Fe3+
cyanocobalamin	B03BA01	B03BA01	1	20	O	P	4	Fe3+	Fe3+
cyclizine	R06AE03	R06AE03	0.1	0.1	O	P	2
cyclizine	R06AE03	R06AE03	0.1	0.3	O	R	4
cyclizine	R06AE03	R06AE03	0.1	0.3	P	R	4
cyproterone	G03HA01	G03HA01	0.1	0.1	O	P	2
delafloxacin	J01MA23	J01MA23	0.9	0.6	O	P	4
dequalinium	G01AC05	R02AA02	20	1.5	V	O	8
desmopressin	H01BA02	H01BA02	25	0.4	N	O	4
desmopressin	H01BA02	H01BA02	25	4	N	P	4
desmopressin	H01BA02	H01BA02	25	0.24	N	SL	4		base
desmopressin	H01BA02	H01BA02	0.4	4	O	P	4
desmopressin	H01BA02	H01BA02	0.4	0.24	O	SL	4		base
desmopressin	H01BA02	H01BA02	4	0.24	P	SL	4		base
desoxycortone	H02AA03	H02AA03	5	5	O	P	2
dexamethasone	H02AB02	H02AB02	1.5	1.5	O	P	2
dexchlorpheniramine	R06AB02	R06AB02	6	6	O	P	2
dexetimide	N04AA08	N04AA08	0.5	0.125	O	P	4
dexketoprofen	M01AE17	M01AE17	75	75	O	P	2
dextromoramide	N02AC01	N02AC01	20	20	O	P	2
dextromoramide	N02AC01	N02AC01	20	40	O	R	4
dextromoramide	N02AC01	N02AC01	20	40	P	R	4
dextropropoxyphene	N02AC04	N02AC04	0.2	0.3	O	O	3	chloride	napsylate
diazepam	N05BA01	N05BA01	10	10	O	P	2
diazepam	N05BA01	N05BA01	10	10	O	R	2
diazepam	N05BA01	N05BA01	10	10	P	R	2
diclofenac	M01AB05	M01AB05	0.1	0.1	O	P	2
diclofenac	M01AB05	M01AB05	0.1	0.1	O	R	2
diclofenac	M01AB05	M01AB05	0.1	0.1	P	R	2
dicloxacillin	J01CF01	J01CF01	2	2	O	P	2
dicycloverine	A03AA07	A03AA07	80	80	O	P	2
dienestrol	G03CB01	G03CB01	2.5	0.2	O	V	4
diethylstilbestrol	G03CB02	G03CB02	0.2	1	O	V	4
diethylstilbestrol	G03CB02	L02AA01	0.2	3	O	O	7
diethylstilbestrol	G03CB02	L02AA01	1	3	V	O	8
digitoxin	C01AA04	C01AA04	0.1	0.1	O	P	2
digoxin	C01AA05	C01AA05	0.25	0.25	O	P	2
dihydralazine	C02DB01	C02DB01	75	25	O	P	4
dihydroergotamine	N02CA01	N02CA01	1	4	N	O	4
dihydroergotamine	N02CA01	N02CA01	1	4	N	P	4
dihydroergotamine	N02CA01	N02CA01	4	4	O	P	2
dimenhydrinate	R06AA11	R06AA11	0.3	0.3	O	R	2
dinoprostone	G02AD02	G02AD02	0.5	0.5	O	V	2
diphenhydramine	R06AA02	R06AA02	0.2	0.2	O	R	2
diprophylline	R03DA01	R03DA01	1	1	O	P	2
diprophylline	R03DA01	R03DA01	1	1	O	R	2
diprophylline	R03DA01	R03DA01	1	1	P	R	2
dipyridamole	B01AC07	B01AC07	0.4	0.2	O	P	4
disopyramide	C01BA03	C01BA03	0.4	0.4	O	P	2
distigmine	N07AA03	N07AA03	5	0.25	O	P	4
dixyrazine	N05AB01	N05AB01	50	30	O	P	4
dolasetron	A04AA04	A04AA04	0.2	0.1	O	P	4
domperidone	A03FA03	A03FA03	30	30	O	P	2
domperidone	A03FA03	A03FA03	30	0.12	O	R	4
domperidone	A03FA03	A03FA03	30	0.12	P	R	4
doxepin	N06AA12	N06AA12	0.1	0.1	O	P	2
doxofylline	R03DA11	R03DA11	0.8	0.8	O	P	2
doxycycline	J01AA02	J01AA02	0.1	0.1	O	P	2
drotaverine	A03AD02	A03AD02	0.1	0.1	O	P	2
emepronium	G04BD01	G04BD01	0.5	75	O	P	4
enalapril	C09AA02	C09AA02	10	10	O	P	2
ephedrine	C01CA26	R01AA03	50	8	P	N	8
ephedrine	C01CA26	R03CA02	50	50	P	O	6
ephedrine	R01AA03	R03CA02	8	50	N	O	8
epicillin	J01CA07	J01CA07	2	2	O	P	2
epinephrine	C01CA24	R03AA01	0.5	2.24	P	Inhal.aerosol	8
epinephrine	C01CA24	R03AA01	0.5	20	P	Inhal.solution	8
epinephrine	R03AA01	R03AA01	2.24	20	Inhal.aerosol	Inhal.solution	4
ergoloid mesylates	C04AE01	C04AE01	3	3	O	P	2
ergometrine	G02AB03	G02AB03	0.2	0.2	O	P	2
ergotamine	N02CA02	N02CA02	4	4	Inhal.aerosol	O	2
ergotamine	N02CA02	N02CA02	4	4	Inhal.aerosol	P	2
ergotamine	N02CA02	N02CA02	4	4	Inhal.aerosol	R	2
ergotamine	N02CA02	N02CA02	4	4	Inhal.aerosol	SL	2
ergotamine	N02CA02	N02CA02	4	4	O	P	2
ergotamine	N02CA02	N02CA02	4	4	O	R	2
ergotamine	N02CA02	N02CA02	4	4	O	SL	2
ergotamine	N02CA02	N02CA02	4	4	P	R	2
ergotamine	N02CA02	N02CA02	4	4	P	SL	2
ergotamine	N02CA02	N02CA02	4	4	R	SL	2
erythromycin	J01FA01	J01FA01	1	2	O	O	3		erythromycin ethylsuccinate tablets
erythromycin	J01FA01	J01FA01	1	1	O	P	2
erythromycin	J01FA01	J01FA01	2	1	O	P	4	erythromycin ethylsuccinate tablets
esomeprazole	A02BC05	A02BC05	30	30	O	P	2
estradiol	G03CA03	G03CA03	0.3	2	N	O	4
estradiol	G03CA03	G03CA03	0.3	1	N	P	4		depot short duration
estradiol	G03CA03	G03CA03	0.3	0.3	N	P	2		depot long duration
estradiol	G03CA03	G03CA03	0.3	5	N	R	4
estradiol	G03CA03	G03CA03	0.3	50	N	TD	4		"patch, refer to amount delivered per 24 hours"
estradiol	G03CA03	G03CA03	0.3	1	N	TD	4		gel
estradiol	G03CA03	G03CA03	0.3	1.53	N	TD	4		spray
estradiol	G03CA03	G03CA03	0.3	25	N	V	4
estradiol	G03CA03	G03CA03	0.3	7.5	N	V	4		"vaginal ring, refers to amount delivered per 24 hours"
estradiol	G03CA03	G03CA03	2	1	O	P	4		depot short duration
estradiol	G03CA03	G03CA03	2	0.3	O	P	4		depot long duration
estradiol	G03CA03	G03CA03	2	5	O	R	4
estradiol	G03CA03	G03CA03	2	50	O	TD	4		"patch, refer to amount delivered per 24 hours"
estradiol	G03CA03	G03CA03	2	1	O	TD	4		gel
estradiol	G03CA03	G03CA03	2	1.53	O	TD	4		spray
estradiol	G03CA03	G03CA03	2	25	O	V	4
estradiol	G03CA03	G03CA03	2	7.5	O	V	4		"vaginal ring, refers to amount delivered per 24 hours"
estradiol	G03CA03	G03CA03	1	0.3	P	P	3	depot short duration	depot long duration
estradiol	G03CA03	G03CA03	1	5	P	R	4	depot short duration
estradiol	G03CA03	G03CA03	1	50	P	TD	4	depot short duration	"patch, refer to amount delivered per 24 hours"
estradiol	G03CA03	G03CA03	1	1	P	TD	2	depot short duration	gel
estradiol	G03CA03	G03CA03	1	1.53	P	TD	4	depot short duration	spray
estradiol	G03CA03	G03CA03	1	25	P	V	4	depot short duration
estradiol	G03CA03	G03CA03	1	7.5	P	V	4	depot short duration	"vaginal ring, refers to amount delivered per 24 hours"
estradiol	G03CA03	G03CA03	0.3	5	P	R	4	depot long duration
estradiol	G03CA03	G03CA03	0.3	50	P	TD	4	depot long duration	"patch, refer to amount delivered per 24 hours"
estradiol	G03CA03	G03CA03	0.3	1	P	TD	4	depot long duration	gel
estradiol	G03CA03	G03CA03	0.3	1.53	P	TD	4	depot long duration	spray
estradiol	G03CA03	G03CA03	0.3	25	P	V	4	depot long duration
estradiol	G03CA03	G03CA03	0.3	7.5	P	V	4	depot long duration	"vaginal ring, refers to amount delivered per 24 hours"
estradiol	G03CA03	G03CA03	5	50	R	TD	4		"patch, refer to amount delivered per 24 hours"
estradiol	G03CA03	G03CA03	5	1	R	TD	4		gel
estradiol	G03CA03	G03CA03	5	1.53	R	TD	4		spray
estradiol	G03CA03	G03CA03	5	25	R	V	4
estradiol	G03CA03	G03CA03	5	7.5	R	V	4		"vaginal ring, refers to amount delivered per 24 hours"
estradiol	G03CA03	G03CA03	50	1	TD	TD	3	"patch, refer to amount delivered per 24 hours"	gel
estradiol	G03CA03	G03CA03	50	1.53	TD	TD	3	"patch, refer to amount delivered per 24 hours"	spray
estradiol	G03CA03	G03CA03	50	25	TD	V	4	"patch, refer to amount delivered per 24 hours"
estradiol	G03CA03	G03CA03	50	7.5	TD	V	4	"patch, refer to amount delivered per 24 hours"	"vaginal ring, refers to amount delivered per 24 hours"
estradiol	G03CA03	G03CA03	1	1.53	TD	TD	3	gel	spray
estradiol	G03CA03	G03CA03	1	25	TD	V	4	gel
estradiol	G03CA03	G03CA03	1	7.5	TD	V	4	gel	"vaginal ring, refers to amount delivered per 24 hours"
estradiol	G03CA03	G03CA03	1.53	25	TD	V	4	spray
estradiol	G03CA03	G03CA03	1.53	7.5	TD	V	4	spray	"vaginal ring, refers to amount delivered per 24 hours"
estradiol	G03CA03	G03CA03	25	7.5	V	V	3		"vaginal ring, refers to amount delivered per 24 hours"
estriol	G03CA04	G03CA04	2	2	O	P	2
estriol	G03CA04	G03CA04	2	0.2	O	V	4
estriol	G03CA04	G03CA04	2	0.2	P	V	4
etacrynic acid	C03CC01	C03CC01	50	50	O	P	2
ethambutol	J04AK02	J04AK02	1.2	1.2	O	P	2
ethinylestradiol	G03CA01	L02AA03	25	1.5	O	O	7
etidronic acid	M05BA01	M05BA01	0.4	1.5	O	P	4		course dose
etilefrine	C01CA01	C01CA01	50	50	O	P	2
everolimus	L01EG02	L04AH02	10	1.5	O	O	7
exenatide	A10BJ01	A10BJ01	0.286	15	P	P	3	depot inj
famotidine	A02BA03	A02BA03	40	40	O	P	2
fenfluramine	A08AA02	N03AX26	0.12	8	O	O	7
fenoterol	R03AC04	R03AC04	0.6	0.6	Inhal.aerosol	Inhal.powder	2
fenoterol	R03AC04	R03AC04	0.6	4	Inhal.aerosol	Inhal.solution	4
fenoterol	R03AC04	R03CC04	0.6	10	Inhal.aerosol	O	8
fenoterol	R03AC04	R03CC04	0.6	10	Inhal.aerosol	R	8
fenoterol	R03AC04	R03AC04	0.6	4	Inhal.powder	Inhal.solution	4
fenoterol	R03AC04	R03CC04	0.6	10	Inhal.powder	O	8
fenoterol	R03AC04	R03CC04	0.6	10	Inhal.powder	R	8
fenoterol	R03AC04	R03CC04	4	10	Inhal.solution	O	8
fenoterol	R03AC04	R03CC04	4	10	Inhal.solution	R	8
fenoterol	R03CC04	R03CC04	10	10	O	R	2
fentanyl	N02AB03	N02AB03	0.6	0.6	N	SL	2
fentanyl	N02AB03	N02AB03	0.6	1.2	N	TD	4
fentanyl	N02AB03	N02AB03	0.6	1.2	SL	TD	4
finasteride	D11AX10	G04CB01	1	5	O	O	7
flecainide	C01BC04	C01BC04	0.2	0.2	O	P	2
fleroxacin	J01MA08	J01MA08	0.4	0.4	O	P	2
flucloxacillin	J01CF05	J01CF05	2	2	O	P	2
fluconazole	J02AC01	J02AC01	0.2	0.2	O	P	2
flucytosine	J02AX01	J02AX01	10	10	O	P	2
flunisolide	R01AD04	R03BA03	0.15	1	N	Inhal.aerosol	8
flunitrazepam	N05CD03	N05CD03	1	1	O	P	2
flupentixol	N05AF01	N05AF01	6	4	O	P	4		depot
fluphenazine	N05AB02	N05AB02	10	1	O	P	4		depot
flurbiprofen	M01AE09	M01AE09	0.2	0.2	O	R	2
flurbiprofen	M01AE09	R02AX01	0.2	44	O	O	7
flurbiprofen	M01AE09	R02AX01	0.2	44	R	O	8
fluticasone	R01AD08	R03BA05	0.2	0.6	N	Inhal.aerosol	8
fluticasone	R01AD08	R03BA05	0.2	0.6	N	Inhal.powder	8
fluticasone	R01AD08	R03BA05	0.2	1.5	N	Inhal.solution	8
fluticasone	R03BA05	R03BA05	0.6	0.6	Inhal.aerosol	Inhal.powder	2
fluticasone	R03BA05	R03BA05	0.6	1.5	Inhal.aerosol	Inhal.solution	4
fluticasone	R03BA05	R03BA05	0.6	1.5	Inhal.powder	Inhal.solution	4
folic acid	B03BB01	B03BB01	0.4	10	O	P	4	prophylactic dose	therapeutic dose
formoterol	R03AC13	R03AC13	24	24	Inhal.aerosol	Inhal.powder	2
formoterol	R03AC13	R03CC15	24	0.16	Inhal.aerosol	O	8
formoterol	R03AC13	R03CC15	24	0.16	Inhal.powder	O	8
fosfestrol	L02AA04	L02AA04	0.25	0.25	O	P	2
fosfomycin	J01XX01	J01XX01	3	8	O	P	4
furosemide	C03CA01	C03CA01	40	40	O	P	2
ganciclovir	J05AB06	J05AB06	3	0.5	O	P	4
gatifloxacin	J01MA16	J01MA16	0.4	0.4	O	P	2
gemifloxacin	J01MA15	J01MA15	0.32	0.2	O	P	4
gestonorone	G03DA01	L02AB03	30	40	P	P	7
glibenclamide	A10BB01	A10BB01	7	10	O	O	3	microcryst.substance
glucagon	H04AA01	H04AA01	3	1	N	P	4
glyceryl trinitrate	C01DA02	C01DA02	5	2.5	O	oral aerosol	4
glyceryl trinitrate	C01DA02	C01DA02	5	2.5	O	SL	4
glyceryl trinitrate	C01DA02	C01DA02	5	5	O	TD	2
glyceryl trinitrate	C01DA02	C01DA02	2.5	2.5	oral aerosol	SL	2
glyceryl trinitrate	C01DA02	C01DA02	2.5	5	oral aerosol	TD	4
glyceryl trinitrate	C01DA02	C01DA02	2.5	5	SL	TD	4
glycopyrronium bromide	A03AB02	A03AB02	3	0.3	O	P	4
glycopyrronium bromide	A03AB02	A03AB02	3	3	O	R	2
glycopyrronium bromide	A03AB02	R03BB06	3	44	O	"Inhal. powder"	8		"Expressed as glycopyrronium, delivered dose"
glycopyrronium bromide	A03AB02	A03AB02	0.3	3	P	R	4
glycopyrronium bromide	A03AB02	R03BB06	0.3	44	P	"Inhal. powder"	8		"Expressed as glycopyrronium, delivered dose"
glycopyrronium bromide	A03AB02	R03BB06	3	44	R	"Inhal. powder"	8		"Expressed as glycopyrronium, delivered dose"
granisetron	A04AA02	A04AA02	2	3	O	P	4
granisetron	A04AA02	A04AA02	2	3.1	O	TD	4
granisetron	A04AA02	A04AA02	3	3.1	P	TD	4
guaifenesin	R05CA03	R05CA03	0.9	0.9	O	P	2
haloperidol	N05AD01	N05AD01	8	8	O	P	2
haloperidol	N05AD01	N05AD01	8	3.3	O	P	4		depot
haloperidol	N05AD01	N05AD01	8	3.3	P	P	3		depot
heptaminol	C01DX08	C01DX08	0.45	0.45	O	P	2
hexoprenaline	R03AC06	R03CC05	1.5	1.5	Inhal.aerosol	O	6
hexoprenaline	R03AC06	R03CC05	1.5	1.5	Inhal.aerosol	P	6
hexoprenaline	R03CC05	R03CC05	1.5	1.5	O	P	2
hydrocortisone	H02AB09	H02AB09	30	30	O	P	2
hydromorphone	N02AA03	N02AA03	20	4	O	P	4
hydromorphone	N02AA03	N02AA03	20	4	O	R	4
hydromorphone	N02AA03	N02AA03	4	4	P	R	2
hydroxyzine	N05BB01	N05BB01	75	75	O	P	2
ibandronic acid	M05BA06	M05BA06	5	6	O	P	4		course dose
ibuprofen	C01EB16	M01AE01	30	1.2	P	O	8
ibuprofen	C01EB16	M01AE01	30	1.2	P	P	7
ibuprofen	C01EB16	M01AE01	30	1.2	P	R	8
ibuprofen	M01AE01	M01AE01	1.2	1.2	O	P	2
ibuprofen	M01AE01	M01AE01	1.2	1.2	O	R	2
ibuprofen	M01AE01	M01AE01	1.2	1.2	P	R	2
iloprost	B01AC11	B01AC11	0.15	50	Inhal.solution	P	4
imipramine	N06AA02	N06AA02	0.1	0.1	O	P	2
indometacin	M01AB01	M01AB01	0.1	0.1	O	P	2
indometacin	M01AB01	M01AB01	0.1	0.1	O	R	2
indometacin	M01AB01	M01AB01	0.1	0.1	P	R	2
indometacin, combinations	M01AB51	M01AB51	0.1	0.1	O	R	2	Refers to indometacin	Refers to indometacin
insulin (beef)	A10AB02	A10AC02	40	40	P	P	5
insulin (beef)	A10AB02	A10AD02	40	40	P	P	5
insulin (beef)	A10AB02	A10AE02	40	40	P	P	5
insulin (beef)	A10AC02	A10AD02	40	40	P	P	5
insulin (beef)	A10AC02	A10AE02	40	40	P	P	5
insulin (beef)	A10AD02	A10AE02	40	40	P	P	5
insulin (human)	A10AB01	A10AC01	40	40	P	P	5
insulin (human)	A10AB01	A10AD01	40	40	P	P	5
insulin (human)	A10AB01	A10AE01	40	40	P	P	5
insulin (human)	A10AB01	A10AF01	40	40	P	P	5
insulin (human)	A10AC01	A10AD01	40	40	P	P	5
insulin (human)	A10AC01	A10AE01	40	40	P	P	5
insulin (human)	A10AC01	A10AF01	40	40	P	P	5
insulin (human)	A10AD01	A10AE01	40	40	P	P	5
insulin (human)	A10AD01	A10AF01	40	40	P	P	5
insulin (human)	A10AE01	A10AF01	40	40	P	P	5
insulin (pork)	A10AB03	A10AC03	40	40	P	P	5
insulin (pork)	A10AB03	A10AD03	40	40	P	P	5
insulin (pork)	A10AB03	A10AE03	40	40	P	P	5
insulin (pork)	A10AC03	A10AD03	40	40	P	P	5
insulin (pork)	A10AC03	A10AE03	40	40	P	P	5
insulin (pork)	A10AD03	A10AE03	40	40	P	P	5
insulin aspart	A10AB05	A10AD05	40	40	P	P	5
insulin lispro	A10AB04	A10AC04	40	40	P	P	5
insulin lispro	A10AB04	A10AD04	40	40	P	P	5
insulin lispro	A10AC04	A10AD04	40	40	P	P	5
ipratropium bromide	R01AX03	R03BB01	0.24	0.12	N	Inhal.aerosol	8
ipratropium bromide	R01AX03	R03BB01	0.24	0.12	N	Inhal.powder	8
ipratropium bromide	R01AX03	R03BB01	0.24	0.3	N	Inhal.solution	8
ipratropium bromide	R03BB01	R03BB01	0.12	0.12	Inhal.aerosol	Inhal.powder	2
ipratropium bromide	R03BB01	R03BB01	0.12	0.3	Inhal.aerosol	Inhal.solution	4
ipratropium bromide	R03BB01	R03BB01	0.12	0.3	Inhal.powder	Inhal.solution	4
isavuconazole	J02AC05	J02AC05	0.2	0.2	O	P	2
isoniazid	J04AC01	J04AC01	0.3	0.3	O	P	2
isoprenaline	C01CA02	C01CA02	90	90	O	P	2
isoprenaline	C01CA02	R03AB02	90	0.64	O	Inhal.aerosol	8
isoprenaline	C01CA02	R03AB02	90	10	O	Inhal.solution	8
isoprenaline	C01CA02	R03CB01	90	40	O	O	7
isoprenaline	C01CA02	R03AB02	90	0.64	P	Inhal.aerosol	8
isoprenaline	C01CA02	R03AB02	90	10	P	Inhal.solution	8
isoprenaline	C01CA02	R03CB01	90	40	P	O	8
isoprenaline	R03AB02	R03AB02	0.64	10	Inhal.aerosol	Inhal.solution	4
isoprenaline	R03AB02	R03CB01	0.64	40	Inhal.aerosol	O	8
isoprenaline	R03AB02	R03CB01	10	40	Inhal.solution	O	8
isosorbide dinitrate	C01DA08	C01DA08	60	20	O	oral aerosol	4
isosorbide dinitrate	C01DA08	C01DA08	60	20	O	SL	4
isosorbide dinitrate	C01DA08	C01DA08	60	0.1	O	TD	4
isosorbide dinitrate	C01DA08	C01DA08	20	20	oral aerosol	SL	2
isosorbide dinitrate	C01DA08	C01DA08	20	0.1	oral aerosol	TD	4
isosorbide dinitrate	C01DA08	C01DA08	20	0.1	SL	TD	4
isoxsuprine	C04AA01	C04AA01	60	60	O	P	2
isradipine	C08CA03	C08CA03	5	5	O	P	2
itraconazole	J02AC02	J02AC02	0.2	0.2	O	P	2
kallidinogenase	C04AF01	C04AF01	30	30	O	P	2
kanamycin	A07AA08	J01GB04	3	1	O	P	8
ketanserin	C02KD01	C02KD01	40	40	O	P	2
ketobemidone	N02AB01	N02AB01	50	50	O	P	2
ketoconazole	G01AF11	H02CA03	0.4	0.6	V	O	8
ketoconazole	G01AF11	J02AB02	0.4	0.2	V	O	8
ketoconazole	H02CA03	J02AB02	0.6	0.2	O	O	7
ketoprofen	M01AE03	M01AE03	0.15	0.15	O	P	2
ketoprofen	M01AE03	M01AE03	0.15	0.15	O	R	2
ketoprofen	M01AE03	M01AE03	0.15	0.15	P	R	2
ketorolac	M01AB15	M01AB15	30	30	O	P	2
labetalol	C07AG01	C07AG01	0.6	0.6	O	P	2
lacosamide	N03AX18	N03AX18	0.3	0.3	O	P	2
lanatoside C	C01AA06	C01AA06	1	1	O	R	2
lentinan	L03AX01	L03AX01	0.3	0.3	O	P	2
letermovir	J05AX18	J05AX18	0.48	0.48	O	P	2
leuprorelin	L02AE02	L02AE02	60	1	implant	P	4
leuprorelin	L02AE02	L02AE02	60	0.134	implant	P	4		depot inj
leuprorelin	L02AE02	L02AE02	1	0.134	P	P	3		depot inj
levetiracetam	N03AX14	N03AX14	1.5	1.5	O	P	2
levocarnitine	A16AA01	A16AA01	2	2	O	P	2
levofloxacin	J01MA12	J01MA12	0.24	0.5	Inhal.solution	O	4
levofloxacin	J01MA12	J01MA12	0.24	0.5	Inhal.solution	P	4
levofloxacin	J01MA12	J01MA12	0.5	0.5	O	P	2
levomepromazine	N05AA02	N05AA02	0.3	0.1	O	P	4
levothyroxine sodium	H03AA01	H03AA01	0.15	0.15	O	P	2
lincomycin	J01FF02	J01FF02	1.8	1.8	O	P	2
linezolid	J01XX08	J01XX08	1.2	1.2	O	P	2
liothyronine sodium	H03AA02	H03AA02	60	60	O	P	2
lorazepam	N05BA06	N05BA06	2.5	2.5	O	P	2
lorazepam	N05BA06	N05BA06	2.5	2.5	O	SL	2
lorazepam	N05BA06	N05BA06	2.5	2.5	P	SL	2
lornoxicam	M01AC05	M01AC05	12	12	O	P	2
lornoxicam	M01AC05	M01AC05	12	12	O	R	2
lornoxicam	M01AC05	M01AC05	12	12	P	R	2
loxapine	N05AH01	N05AH01	9.1	0.1	"Inhal. powder"	O	4	delivered dose
lymecycline	J01AA04	J01AA04	0.6	0.6	O	P	2
lypressin	H01BA03	H01BA03	20	20	N	P	2
magnesium hydroxide	A02AA04	G04BX01	3	0.5	O	O	7
magnesium sulfate	A06AD04	A12CC02	7	3	O	O	7
maprotiline	N06AA21	N06AA21	0.1	0.1	O	P	2
meclozine	R06AE05	R06AE05	50	50	O	R	2
mecobalamin	B03BA05	B03BA05	1.5	0.2	O	P	4	Fe3+	Fe3+
medroxyprogesterone	G03AC06	G03DA02	1.67	5	P	O	8
medroxyprogesterone	G03AC06	G03DA02	1.67	7	P	P	7
medroxyprogesterone	G03AC06	L02AB02	1.67	1	P	O	8
medroxyprogesterone	G03AC06	L02AB02	1.67	1	P	P	7
medroxyprogesterone	G03DA02	G03DA02	5	7	O	P	4
medroxyprogesterone	G03DA02	L02AB02	5	1	O	O	7
medroxyprogesterone	G03DA02	L02AB02	5	1	O	P	8
medroxyprogesterone	G03DA02	L02AB02	7	1	P	O	8
medroxyprogesterone	G03DA02	L02AB02	7	1	P	P	7
medroxyprogesterone	L02AB02	L02AB02	1	1	O	P	2
megestrol	G03DB02	L02AB01	5	0.16	O	O	7
melitracen	N06AA14	N06AA14	75	75	O	P	2
meloxicam	M01AC06	M01AC06	15	15	O	P	2
meloxicam	M01AC06	M01AC06	15	15	O	R	2
meloxicam	M01AC06	M01AC06	15	15	P	R	2
melperone	N05AD03	N05AD03	0.3	0.3	O	P	2
menadione	B02BA02	B02BA02	10	2	O	P	4
meptazinol	N02AX05	N02AX05	1.2	1.2	O	P	2
mepyramine	R06AC01	R06AC01	0.2	0.2	O	P	2
mesalazine	A07EC02	A07EC02	1.5	1.5	O	R	2
mesoridazine	N05AC03	N05AC03	0.2	0.2	O	P	2
metamizole sodium	N02BB02	N02BB02	3	3	O	P	2
metamizole sodium	N02BB02	N02BB02	3	3	O	R	2
metamizole sodium	N02BB02	N02BB02	3	3	P	R	2
metampicillin	J01CA14	J01CA14	1.5	1.5	O	P	2
metenolone	A14AA04	A14AA04	10	7	O	P	4
methadone	N07BC02	N07BC02	25	25	O	P	2
methenamine	J01XX05	J01XX05	2	3	O	O	3	hippurate	mandelate
methocarbamol	M03BA03	M03BA03	3	3	O	P	2
methotrexate	L04AX03	L04AX03	2.5	2.5	O	P	2
methyldopa (levorotatory)	C02AB01	C02AB01	1	1	O	P	2
methylergometrine	G02AB01	G02AB01	0.2	0.2	O	P	2
methylprednisolone	H02AB04	H02AB04	7.5	20	O	P	4
methylscopolamine	A03BB03	A03BB03	12	12	O	P	2
metildigoxin	C01AA08	C01AA08	0.2	0.2	O	P	2
metoclopramide	A03FA01	A03FA01	30	30	O	P	2
metoclopramide	A03FA01	A03FA01	30	30	O	R	2
metoclopramide	A03FA01	A03FA01	30	30	P	R	2
metopimazine	A04AD05	A04AD05	15	15	O	P	2
metoprolol	C07AB02	C07AB02	0.15	0.15	O	P	2
metronidazole	G01AF01	J01XD01	0.5	1.5	V	P	8
metronidazole	G01AF01	P01AB01	0.5	2	V	O	8
metronidazole	G01AF01	P01AB01	0.5	2	V	R	8
metronidazole	J01XD01	P01AB01	1.5	2	P	O	8
metronidazole	J01XD01	P01AB01	1.5	2	P	R	8
metronidazole	P01AB01	P01AB01	2	2	O	R	2
mexiletine	C01BB02	C01BB02	0.8	0.8	O	P	2
miconazole	A01AB09	A07AC01	0.2	1	O	O	7
miconazole	A01AB09	G01AF04	0.2	0.1	O	V	8
miconazole	A01AB09	J02AB01	0.2	1	O	P	8
miconazole	A07AC01	G01AF04	1	0.1	O	V	8
miconazole	A07AC01	J02AB01	1	1	O	P	6
miconazole	G01AF04	J02AB01	0.1	1	V	P	8
midazolam	N05CD08	N05CD08	5	15	N	O	4
midazolam	N05CD08	N05CD08	5	15	N	P	4
midazolam	N05CD08	N05CD08	5	10	N	SL	4
midazolam	N05CD08	N05CD08	15	15	O	P	2
midazolam	N05CD08	N05CD08	15	10	O	SL	4
midazolam	N05CD08	N05CD08	15	10	P	SL	4
midecamycin	J01FA03	J01FA03	1.2	1	O	P	4
minocycline	A01AB23	J01AA08	1	0.2	O	O	7
minocycline	A01AB23	J01AA08	1	0.2	O	P	8
minocycline	J01AA08	J01AA08	0.2	0.2	O	P	2
misoprostol	A02BB01	G02AD06	0.8	0.2	O	O	7
misoprostol	A02BB01	G02AD06	0.8	0.2	O	V	8		"vaginal insert, refers to the content of one vaginal insert"
misoprostol	G02AD06	G02AD06	0.2	0.2	O	V	2		"vaginal insert, refers to the content of one vaginal insert"
mofebutazone	M01AA02	M01AA02	0.75	0.75	O	P	2
mometasone	R01AD09	R03BA07	0.2	0.4	N	Inhal.powder	8
moperone	N05AD04	N05AD04	20	20	O	P	2
morphine	N02AA01	N02AA01	0.1	30	O	P	4
morphine	N02AA01	N02AA01	0.1	30	O	R	4
morphine	N02AA01	N02AA01	30	30	P	R	2
moxifloxacin	J01MA14	J01MA14	0.4	0.4	O	P	2
mycophenolic acid	L04AA06	L04AA06	2	2	O	P	2	as mycophenolate mofetil
naproxen	M01AE02	M01AE02	0.5	0.5	O	R	2
natamycin	A01AB10	A07AA03	20	0.3	O	O	7
natamycin	A01AB10	G01AA02	20	25	O	V	8
natamycin	A07AA03	G01AA02	0.3	25	O	V	8
nedocromil	R01AC07	R03BC03	10.4	8	N	Inhal.aerosol	8
neomycin	A07AA01	J01GB05	5	1	O	P	8
neostigmine	N07AA01	N07AA01	60	2	O	P	4
neostigmine	N07AA01	S01EB06	60	0.4	O	Ophthalmic	8
neostigmine	N07AA01	S01EB06	60	40	O	ointment	8
neostigmine	N07AA01	S01EB06	2	0.4	P	Ophthalmic	8
neostigmine	N07AA01	S01EB06	2	40	P	ointment	8
neostigmine	S01EB06	S01EB06	0.4	40	Ophthalmic	ointment	4
netilmicin	J01GB07	J01GB07	0.35	0.35	O	P	2
nicardipine	C08CA04	C08CA04	90	90	O	P	2
nicomorphine	N02AA04	N02AA04	30	30	O	P	2
nicomorphine	N02AA04	N02AA04	30	30	O	R	2
nicomorphine	N02AA04	N02AA04	30	30	P	R	2
nicotine	N07BA01	N07BA01	30	60	Chewing gum	Inhal	4
nicotine	N07BA01	N07BA01	30	30	Chewing gum	N	2
nicotine	N07BA01	N07BA01	30	30	Chewing gum	SL	2
nicotine	N07BA01	N07BA01	30	14	Chewing gum	TD	4
nicotine	N07BA01	N07BA01	60	30	Inhal	N	4
nicotine	N07BA01	N07BA01	60	30	Inhal	SL	4
nicotine	N07BA01	N07BA01	60	14	Inhal	TD	4
nicotine	N07BA01	N07BA01	30	30	N	SL	2
nicotine	N07BA01	N07BA01	30	14	N	TD	4
nicotine	N07BA01	N07BA01	30	14	SL	TD	4
nicotinic acid	C04AC01	C04AC01	0.2	0.2	O	P	2
nicotinic acid	C04AC01	C10AD02	0.2	2	O	O	7
nicotinic acid	C04AC01	C10AD02	0.2	2	P	O	8
nicotinyl alcohol (pyridylcarbinol)	C04AC02	C04AC02	0.3	0.3	O	P	2
nicotinyl alcohol (pyridylcarbinol)	C04AC02	C10AD05	0.3	0.9	O	O	7
nicotinyl alcohol (pyridylcarbinol)	C04AC02	C10AD05	0.3	0.9	P	O	8
nifedipine	C08CA05	C08CA05	30	30	O	P	2
nifuratel	G01AX05	G01AX05	0.6	0.6	O	V	2
nikethamide	R07AB02	R07AB02	0.5	0.5	O	P	2
nimodipine	C08CA06	C08CA06	0.3	50	O	P	4
nizatidine	A02BA04	A02BA04	0.3	0.3	O	P	2
norethisterone	G03AC01	G03DC02	2.5	5	P	O	8
nortriptyline	N06AA10	N06AA10	75	30	O	P	4
nystatin	A07AA02	G01AA01	1.5	0.1	O	V	8
ofloxacin	J01MA01	J01MA01	0.4	0.4	O	P	2
olanzapine	N05AH03	N05AH03	10	10	O	P	2
olanzapine	N05AH03	N05AH03	10	10	O	P	2		depot
olanzapine	N05AH03	N05AH03	10	10	P	P	1		depot
omadacycline	J01AA15	J01AA15	0.3	0.1	O	P	4
omeprazole	A02BC01	A02BC01	20	20	O	P	2
ondansetron	A04AA01	A04AA01	16	16	O	P	2
ondansetron	A04AA01	A04AA01	16	16	O	R	2
ondansetron	A04AA01	A04AA01	16	16	P	R	2
orciprenaline	R03AB03	R03CB03	6	60	Inhal.aerosol	O	8
orciprenaline	R03AB03	R03CB03	6	60	Inhal.aerosol	P	8
orciprenaline	R03CB03	R03CB03	60	60	O	P	2
ornidazole	J01XD03	P01AB03	1	1.5	P	O	8
orphenadrine (chloride)	N04AB02	N04AB02	0.2	0.2	O	P	2
orphenadrine (citrate)	M03BC01	M03BC01	0.12	0.12	O	P	2
oxacillin	J01CF04	J01CF04	2	2	O	P	2
oxedrine	C01CA08	C01CA08	0.2	0.2	O	P	2
oxitropium bromide	R03BB02	R03BB02	0.6	4	Inhal.aerosol	Inhal.solution	4
oxprenolol	C07AA02	C07AA02	0.16	0.16	O	P	2
oxybutynin	G04BD04	G04BD04	15	3.9	O	TD	4
oxycodone	N02AA05	N02AA05	75	30	O	P	4
oxyfedrine	C01DX03	C01DX03	40	40	O	P	2
oxyphenbutazone	M01AA03	M01AA03	0.3	0.3	O	R	2
oxytetracycline	J01AA06	J01AA06	1	1	O	P	2
oxytocin	H01BB02	H01BB02	15	200	N	O	4
oxytocin	H01BB02	H01BB02	15	15	N	P	2
oxytocin	H01BB02	H01BB02	200	15	O	P	4
paliperidone	N05AX13	N05AX13	6	2.5	O	P	4		depot Expressed as paliperidone
palonosetron	A04AA05	A04AA05	0.5	0.25	O	P	4
pantoprazole	A02BC02	A02BC02	40	40	O	P	2
papaverine	A03AD01	A03AD01	0.1	0.1	O	P	2
paracetamol	N02BE01	N02BE01	3	3	O	P	2
paracetamol	N02BE01	N02BE01	3	3	O	R	2
paracetamol	N02BE01	N02BE01	3	3	P	R	2
paraldehyde	N05CC05	N05CC05	5	5	O	P	2
paraldehyde	N05CC05	N05CC05	5	5	O	R	2
paraldehyde	N05CC05	N05CC05	5	5	P	R	2
paramethasone	H02AB05	H02AB05	4	4	O	P	2
paricalcitol	H05BX02	H05BX02	2	2	O	P	2
pefloxacin	J01MA03	J01MA03	0.8	0.8	O	P	2
pentazocine	N02AD01	N02AD01	0.2	0.2	O	P	2
pentobarbital	N05CA01	N05CA01	0.1	0.1	O	P	2
pentobarbital	N05CA01	N05CA01	0.1	0.1	O	R	2
pentobarbital	N05CA01	N05CA01	0.1	0.1	P	R	2
pentoxifylline	C04AD03	C04AD03	1	0.3	O	P	4
pentoxyverine	R05DB05	R05DB05	0.1	0.1	O	R	2
perazine	N05AB10	N05AB10	0.1	0.1	O	P	2
periciazine	N05AC01	N05AC01	50	20	O	P	4
perphenazine	N05AB03	N05AB03	30	7	O	P	4		depot
perphenazine	N05AB03	N05AB03	30	10	O	P	4
perphenazine	N05AB03	N05AB03	30	16	O	R	4
perphenazine	N05AB03	N05AB03	7	10	P	P	3	depot
perphenazine	N05AB03	N05AB03	7	16	P	R	4	depot
perphenazine	N05AB03	N05AB03	10	16	P	R	4
pethidine	N02AB02	N02AB02	0.4	0.4	O	P	2
pethidine	N02AB02	N02AB02	0.4	0.4	O	R	2
pethidine	N02AB02	N02AB02	0.4	0.4	P	R	2
phenobarbital	N03AA02	N03AA02	0.1	0.1	O	P	2
phentolamine	C04AB01	C04AB01	10	10	O	P	2
phenylbutazone	M01AA01	M01AA01	0.3	0.3	O	P	2
phenylbutazone	M01AA01	M01AA01	0.3	0.3	O	R	2
phenylbutazone	M01AA01	M01AA01	0.3	0.3	P	R	2
phenylephrine	C01CA06	R01AA04	4	4	P	N	6
phenylephrine	C01CA06	R01BA03	4	40	P	O	8
phenylephrine	R01AA04	R01BA03	4	40	N	O	8
phenytoin	N03AB02	N03AB02	0.3	0.3	O	P	2
phytomenadione	B02BA01	B02BA01	20	20	O	P	2
pilocarpine	N07AX01	N07AX01	15	10	O	P	4
pilocarpine	N07AX01	S01EB01	15	0.4	O	Ophthalmic	8
pilocarpine	N07AX01	S01EB01	15	0.285	O	lamella	8
pilocarpine	N07AX01	S01EB01	15	40	O	ointment	8
pilocarpine	N07AX01	S01EB01	10	0.4	P	Ophthalmic	8
pilocarpine	N07AX01	S01EB01	10	0.285	P	lamella	8
pilocarpine	N07AX01	S01EB01	10	40	P	ointment	8
pilocarpine	S01EB01	S01EB01	0.4	0.285	Ophthalmic	lamella	4
pilocarpine	S01EB01	S01EB01	0.4	40	Ophthalmic	ointment	4
pilocarpine	S01EB01	S01EB01	0.285	40	lamella	ointment	4
pindolol	C07AA03	C07AA03	15	15	O	P	2
pipotiazine	N05AC04	N05AC04	10	5	O	P	4		depot
piracetam	N06BX03	N06BX03	2.4	6	O	P	4
pirbuterol	R03AC08	R03CC07	1.2	30	Inhal.aerosol	O	8
pirenzepine	A02BX03	A02BX03	0.1	20	O	P	4
piroxicam	M01AC01	M01AC01	20	20	O	P	2
piroxicam	M01AC01	M01AC01	20	20	O	R	2
piroxicam	M01AC01	M01AC01	20	20	P	R	2
polymyxin B	A07AA05	J01XB02	3	0.15	O	P	8
posaconazole	J02AC04	J02AC04	0.3	0.3	O	P	2
practolol	C07AB01	C07AB01	0.3	20	O	P	4
prednisolone	H02AB06	H02AB06	10	10	O	P	2
prethcamide	R07AB06	R07AB06	0.4	0.4	O	P	2
procainamide	C01BA02	C01BA02	3	3	O	P	2
procaterol	R03AC16	R03CC08	60	0.1	Inhal.aerosol	O	8
prochlorperazine	N05AB04	N05AB04	0.1	50	O	P	4
prochlorperazine	N05AB04	N05AB04	0.1	0.1	O	R	2
prochlorperazine	N05AB04	N05AB04	50	0.1	P	R	4
procyclidine	N04AA04	N04AA04	25	25	O	P	2
progesterone	G03DA04	G03DA04	0.3	5	O	P	4
progesterone	G03DA04	G03DA04	0.3	0.2	O	R	4
progesterone	G03DA04	G03DA04	0.3	90	O	V	4
progesterone	G03DA04	G03DA04	5	0.2	P	R	4
progesterone	G03DA04	G03DA04	5	90	P	V	4
progesterone	G03DA04	G03DA04	0.2	90	R	V	4
promazine	N05AA03	N05AA03	0.3	0.1	O	P	4
promethazine	R06AD02	R06AD02	25	25	O	P	2
promethazine	R06AD02	R06AD02	25	25	O	R	2
promethazine	R06AD02	R06AD02	25	25	P	R	2
propafenone	C01BC03	C01BC03	0.3	0.3	O	P	2
propantheline	A03AB05	A03AB05	60	60	O	P	2
propranolol	C07AA05	C07AA05	0.16	0.16	O	P	2
proquazone	M01AX13	M01AX13	0.9	0.9	O	R	2
prothipendyl	N05AX07	N05AX07	0.24	0.24	O	P	2
proxyphylline	R03DA03	R03DA03	1.2	1.2	O	P	2
proxyphylline	R03DA03	R03DA03	1.2	1.2	O	R	2
proxyphylline	R03DA03	R03DA03	1.2	1.2	P	R	2
pyridostigmine	N07AA02	N07AA02	0.18	10	O	P	4
pyridoxine (vit B6)	A11HA02	A11HA02	0.16	0.16	O	P	2
pyrimethamine, combinations	P01BD51	P01BD51	75	75	O	P	2	Refers to pyrimethamine	Refers to pyrimethamine
quinapril	C09AA06	C09AA06	15	15	O	P	2
quinine	P01BC01	P01BC01	1.5	1.5	O	P	2	base	base
ranitidine	A02BA02	A02BA02	0.3	0.3	O	P	2
remoxipride	N05AL04	N05AL04	0.3	0.3	O	P	2
reserpine	C02AA02	C02AA02	0.5	0.5	O	P	2
retinol (vit A)	A11CA01	A11CA01	50	50	O	P	2
ribavirin	J05AP01	J05AP01	6	1	Inhal.solution	O	4
rifampicin	J04AB02	J04AB02	0.6	0.6	O	P	2
rilpivirine	J05AG05	J05AG05	25	15	O	P	4
risperidone	N05AX08	N05AX08	5	2.7	O	P	4		depot
ritodrine	G02CA01	G02CA01	40	40	O	P	2
rivastigmine	N06DA03	N06DA03	9	9.5	O	TD	4		delivered dose
salbutamol	R03AC02	R03AC02	0.8	0.8	Inhal.aerosol	Inhal.powder	2
salbutamol	R03AC02	R03AC02	0.8	10	Inhal.aerosol	Inhal.solution	4
salbutamol	R03AC02	R03CC02	0.8	12	Inhal.aerosol	O	8
salbutamol	R03AC02	R03CC02	0.8	12	Inhal.aerosol	P	8
salbutamol	R03AC02	R03AC02	0.8	10	Inhal.powder	Inhal.solution	4
salbutamol	R03AC02	R03CC02	0.8	12	Inhal.powder	O	8
salbutamol	R03AC02	R03CC02	0.8	12	Inhal.powder	P	8
salbutamol	R03AC02	R03CC02	10	12	Inhal.solution	O	8
salbutamol	R03AC02	R03CC02	10	12	Inhal.solution	P	8
salbutamol	R03CC02	R03CC02	12	12	O	P	2
salmeterol	R03AC12	R03AC12	0.1	0.1	Inhal.aerosol	Inhal.powder	2
scopolamine	N05CM05	N05CM05	0.9	0.9	O	P	2
semaglutide	A10BJ06	A10BJ06	10.5	0.11	O	P	4
sodium aminosalicylate	J04AA02	J04AA02	14	14	O	P	2
sodium fluoride	A01AA01	A12CD01	1.1	88	O	O	7	0.5 mg fluoride	40 mg fluoride
sodium phosphate	A06AD17	V03AG05	50	8	O	O	7
sotalol	C07AA07	C07AA07	0.16	0.16	O	P	2
stanozolol	A14AA02	A14AA02	5	3.5	O	P	4
sulfafurazole	J01EB05	J01EB05	4	4	O	P	2
sulfaisodimidine	J01EB01	J01EB01	4	4	O	P	2
sulfamazone	J01ED09	J01ED09	1.5	1.5	O	R	2
sulfamoxole	J01EC03	J01EC03	1	1	O	P	2
sulfasalazine	A07EC01	A07EC01	2	2	O	R	2
sulindac	M01AB02	M01AB02	0.4	0.4	O	P	2
sulindac	M01AB02	M01AB02	0.4	0.4	O	R	2
sulindac	M01AB02	M01AB02	0.4	0.4	P	R	2
sulodexide	B01AB11	B01AB11	500	500	O	P	2	LSU = lipoprotein lipase releasing units	LSU = lipoprotein lipase releasing units
sulpiride	N05AL01	N05AL01	0.8	0.8	O	P	2
sumatriptan	N02CC01	N02CC01	20	50	N	O	4
sumatriptan	N02CC01	N02CC01	20	6	N	P	4
sumatriptan	N02CC01	N02CC01	20	25	N	R	4
sumatriptan	N02CC01	N02CC01	50	6	O	P	4
sumatriptan	N02CC01	N02CC01	50	25	O	R	4
sumatriptan	N02CC01	N02CC01	6	25	P	R	4
tacrolimus	L04AD02	L04AD02	5	5	O	P	2
tedizolid	J01XX11	J01XX11	0.2	0.2	O	P	2
tenoxicam	M01AC02	M01AC02	20	20	O	P	2
tenoxicam	M01AC02	M01AC02	20	20	O	R	2
tenoxicam	M01AC02	M01AC02	20	20	P	R	2
terbutaline	R03AC03	R03AC03	2	2	Inhal.aerosol	Inhal.powder	2
terbutaline	R03AC03	R03AC03	2	20	Inhal.aerosol	Inhal.solution	4
terbutaline	R03AC03	R03CC03	2	15	Inhal.aerosol	O	8
terbutaline	R03AC03	R03CC03	2	15	Inhal.aerosol	P	8
terbutaline	R03AC03	R03AC03	2	20	Inhal.powder	Inhal.solution	4
terbutaline	R03AC03	R03CC03	2	15	Inhal.powder	O	8
terbutaline	R03AC03	R03CC03	2	15	Inhal.powder	P	8
terbutaline	R03AC03	R03CC03	20	15	Inhal.solution	O	8
terbutaline	R03AC03	R03CC03	20	15	Inhal.solution	P	8
terbutaline	R03CC03	R03CC03	15	15	O	P	2
testosterone	G03BA03	G03BA03	0.12	18	O	P	4
testosterone	G03BA03	G03BA03	0.12	0.12	O	R	2
testosterone	G03BA03	G03BA03	0.12	60	O	SL	4
testosterone	G03BA03	G03BA03	0.12	50	O	TD	4		gel
testosterone	G03BA03	G03BA03	0.12	3	O	TD	4
testosterone	G03BA03	G03BA03	18	0.12	P	R	4
testosterone	G03BA03	G03BA03	18	60	P	SL	4
testosterone	G03BA03	G03BA03	18	50	P	TD	4		gel
testosterone	G03BA03	G03BA03	18	3	P	TD	4
testosterone	G03BA03	G03BA03	0.12	60	R	SL	4
testosterone	G03BA03	G03BA03	0.12	50	R	TD	4		gel
testosterone	G03BA03	G03BA03	0.12	3	R	TD	4
testosterone	G03BA03	G03BA03	60	50	SL	TD	4		gel
testosterone	G03BA03	G03BA03	60	3	SL	TD	4
testosterone	G03BA03	G03BA03	50	3	TD	TD	3	gel
tetracycline	J01AA07	J01AA07	1	1	O	P	2
theophylline	R03DA04	R03DA04	0.4	0.4	O	P	2
theophylline	R03DA04	R03DA04	0.4	0.4	O	R	2
theophylline	R03DA04	R03DA04	0.4	0.4	P	R	2
thiamazole	H03BB02	H03BB02	10	0.33	O	O	3		The DDDs are based on systemic therapy in thyroid disease. The DDD is given in amount of iodide.
thiamazole	H03BB02	H03BB02	10	0.33	O	P	4
thiamazole	H03BB02	H03BB02	0.33	0.33	O	P	2	The DDDs are based on systemic therapy in thyroid disease. The DDD is given in amount of iodide.
thiamine (vit B1)	A11DA01	A11DA01	50	50	O	P	2
thiamphenicol	J01BA02	J01BA02	1.5	1.5	O	P	2
thiazinam	R06AD06	R06AD06	0.9	0.3	O	R	4
thiethylperazine	R06AD03	R06AD03	13	13	O	P	2
thiethylperazine	R06AD03	R06AD03	13	13	O	R	2
thiethylperazine	R06AD03	R06AD03	13	13	P	R	2
thioctic acid	A16AX01	A16AX01	0.6	0.6	O	P	2
thioproperazine	N05AB08	N05AB08	75	20	O	P	4
tiapride	N05AL03	N05AL03	0.4	0.4	O	P	2
tiaprofenic acid	M01AE11	M01AE11	0.6	0.6	O	R	2
tilidine	N02AX01	N02AX01	0.2	0.2	O	P	2
timolol	C07AA06	C07AA06	20	20	O	P	2
tinidazole	G01AF21	J01XD02	0.2	1.5	V	P	8
tinidazole	G01AF21	P01AB02	0.2	2	V	O	8
tinidazole	G01AF21	P01AB02	0.2	2	V	R	8
tinidazole	J01XD02	P01AB02	1.5	2	P	O	8
tinidazole	J01XD02	P01AB02	1.5	2	P	R	8
tinidazole	P01AB02	P01AB02	2	2	O	R	2
tiotropium bromide	R03BB04	R03BB04	10	5	"Inhal. powder"	Inhal.solution	4	"Expressed as tiotropium, delivered dose"
tobramycin	J01GB01	J01GB01	0.112	0.3	Inhal.powder	Inhal.solution	4
tobramycin	J01GB01	J01GB01	0.112	0.24	Inhal.powder	P	4
tobramycin	J01GB01	J01GB01	0.3	0.24	Inhal.solution	P	4
tocainide	C01BB03	C01BB03	1.2	1.2	O	P	2
tocopherol (vit E)	A11HA03	A11HA03	0.2	0.2	O	P	2
tolfenamic acid	M01AG02	M01AG02	0.3	0.3	O	R	2
tolmetin	M01AB03	M01AB03	0.7	0.7	O	R	2
torasemide	C03CA04	C03CA04	15	15	O	P	2
tramadol	N02AX02	N02AX02	0.3	0.3	O	P	2
tramadol	N02AX02	N02AX02	0.3	0.3	O	R	2
tramadol	N02AX02	N02AX02	0.3	0.3	P	R	2
tranexamic acid	B02AA02	B02AA02	2	2	O	P	2
tretoquinol	R03CC09	R03CC09	9	0.2	O	P	4
triamcinolone	H02AB08	H02AB08	7.5	7.5	O	P	2
triamcinolone	H02AB08	R01AD11	7.5	0.22	O	N	8
triamcinolone	H02AB08	R01AD11	7.5	0.22	P	N	8
triazolam	N05CD05	N05CD05	0.25	0.2	O	SL	4
trifluoperazine	N05AB06	N05AB06	20	8	O	P	4
trifluoperazine	N05AB06	N05AB06	20	20	O	R	2
trifluoperazine	N05AB06	N05AB06	8	20	P	R	4
triflupromazine	N05AA05	N05AA05	0.1	0.1	O	P	2
trimethoprim	J01EA01	J01EA01	0.4	0.4	O	P	2
trimethyldiphenylpropylamine	A03AX30	A03AX30	50	50	O	P	2
trimipramine	N06AA06	N06AA06	0.15	0.15	O	P	2
triptorelin	L02AE04	L02AE04	0.134	0.1	P	P	3	depot inj
tropisetron	A04AA03	A04AA03	5	5	O	P	2
trovafloxacin	J01MA13	J01MA13	0.2	0.2	O	P	2
tulobuterol	R03AC11	R03CC11	1.6	4	Inhal.aerosol	O	8
ulipristal	G03AD02	G03XB02	30	5	O	O	7
urapidil	C02CA06	C02CA06	0.12	50	O	P	4
valproic acid	N03AG01	N03AG01	1.5	1.5	O	P	2
valproic acid	N03AG01	N03AG01	1.5	1.5	O	R	2
valproic acid	N03AG01	N03AG01	1.5	1.5	P	R	2
vancomycin	A07AA09	J01XA01	2	2	O	P	6
verapamil	C08DA01	C08DA01	0.24	0.24	O	P	2
voriconazole	J02AC03	J02AC03	0.4	0.4	O	P	2
warfarin	B01AA03	B01AA03	7.5	7.5	O	P	2
xantinol nicotinate	C04AD02	C04AD02	0.9	0.9	O	P	2
zanamivir	J05AH01	J05AH01	20	1.2	Inhal.powder	P	4
zidovudine	J05AF01	J05AF01	0.6	0.6	O	P	2
ziprasidone	N05AE04	N05AE04	80	40	O	P	4
zolmitriptan	N02CC03	N02CC03	2.5	2.5	N	O	2
zuclopenthixol	N05AF05	N05AF05	30	15	O	P	4		depot
zuclopenthixol	N05AF05	N05AF05	30	30	O	P	2
zuclopenthixol	N05AF05	N05AF05	15	30	P	P	3	depot
